# Supplementary material for: COVID-19 Vaccine Booster Dose Acceptance: Systematic Review and Meta-Analysis
Source: MDPI journal article supplement (doi:10.3390/tropicalmed7100298), 2022-10-13
Supplement: s1 [file s1]

**Figure S1: Additional Results**

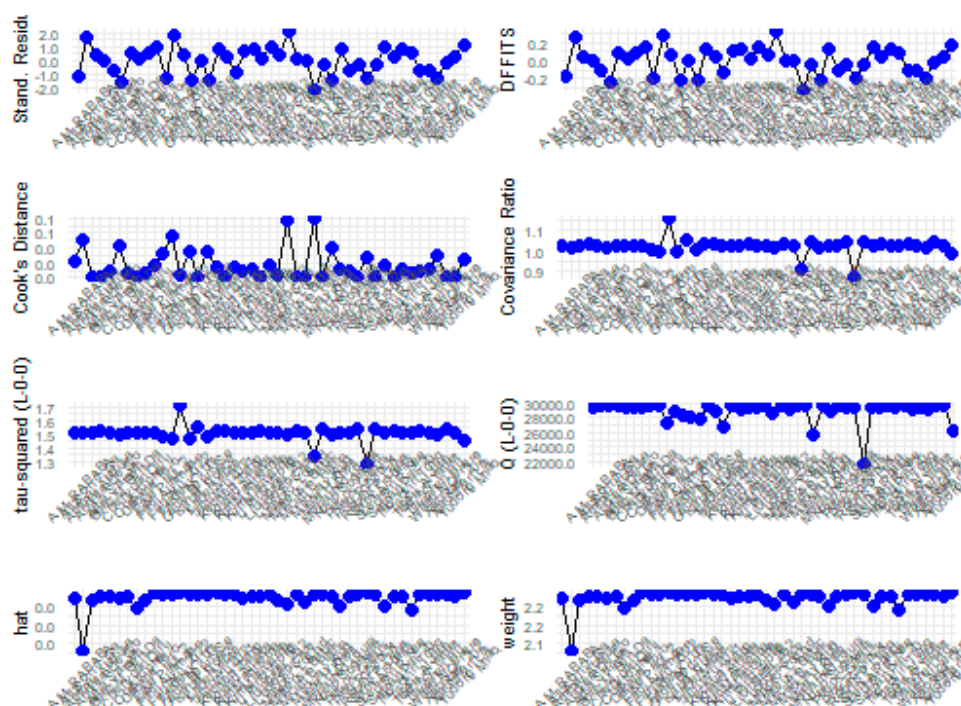

Leave one out analysis for intention to get the booster dose of COVID-19 vaccines

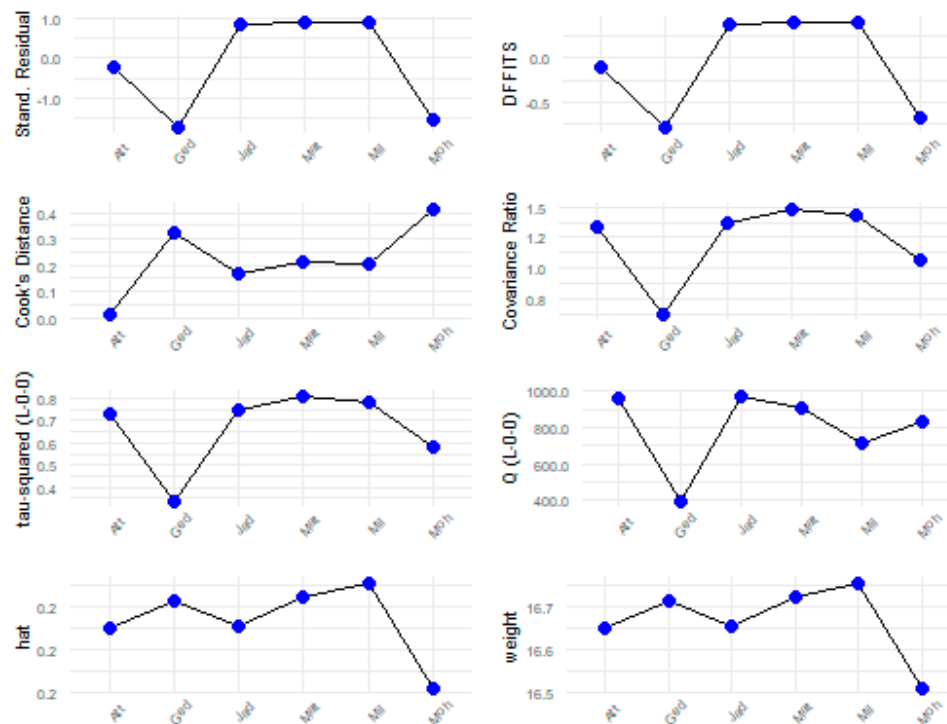

Leave one out analysis for the actual uptake of the COVID-19 vaccine booster dose

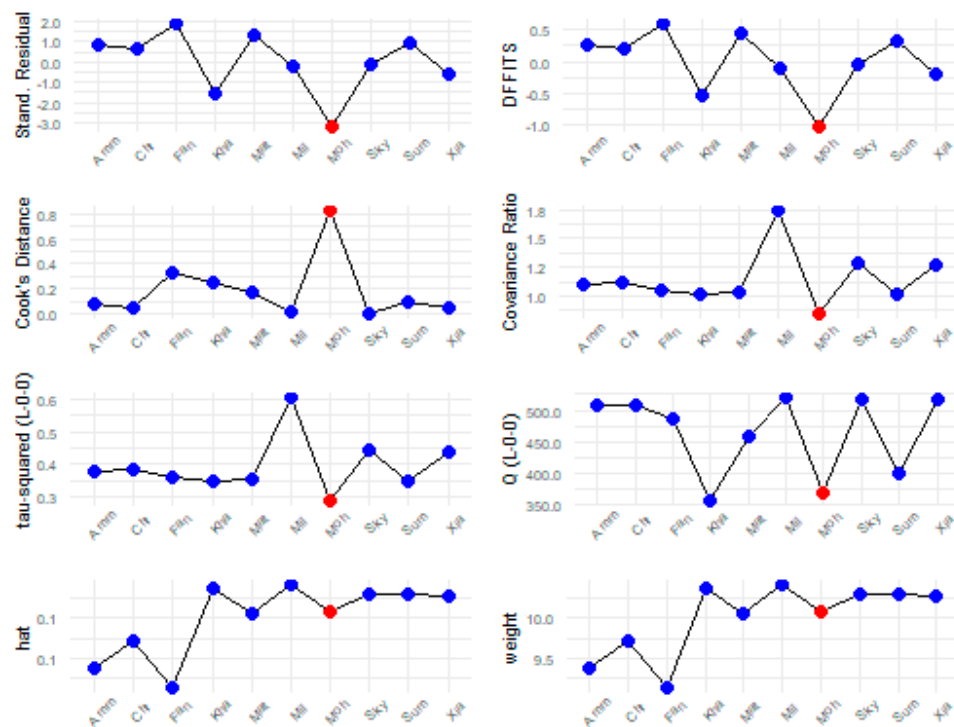

Leave one out analysis for HCWs acceptance of booster dose of COVID-19 vaccines

# Shaimaa Abdelaziz Abdelmoneim et al. COVID-19 Vaccine Booster Dose Acceptance: Systematic Review and Meta-analysis

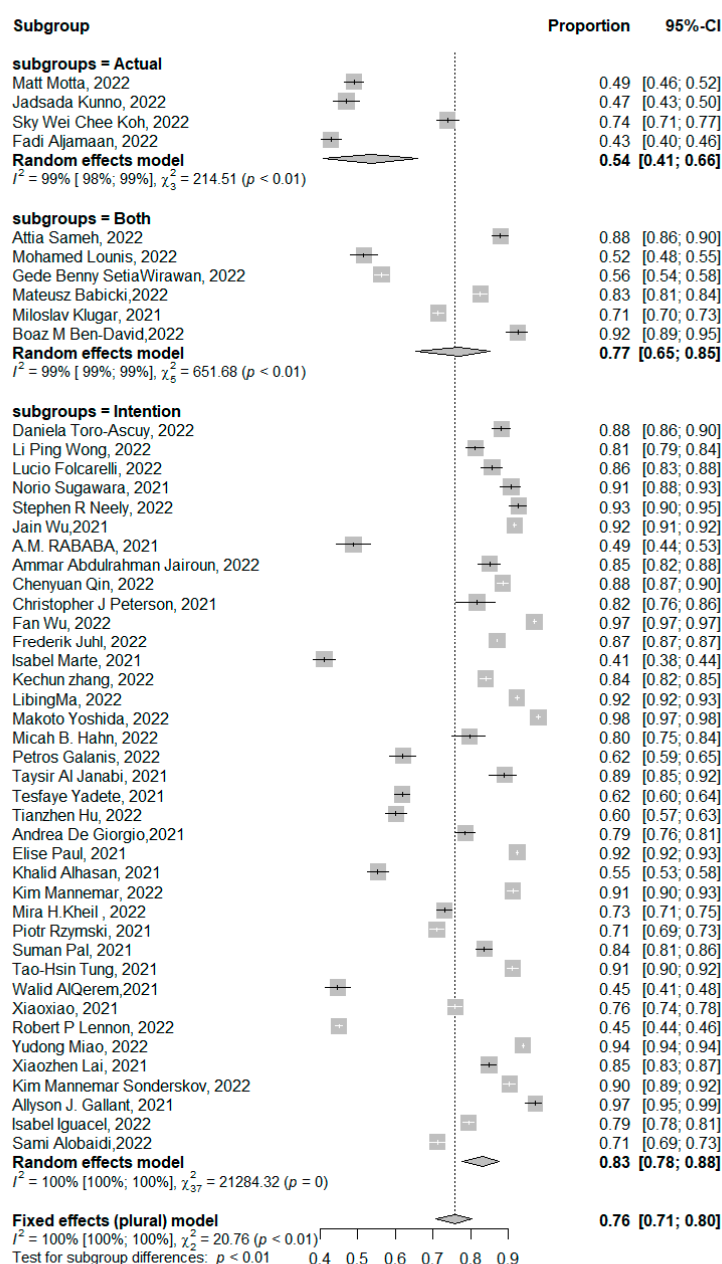

Subgroup analysis for total booster COVID-19 vaccine acceptance according to actual uptake and intention to get vaccinated

Shaimaa Abdelaziz Abdelmoneim et al. COVID-19 Vaccine Booster Dose Acceptance: Systematic Review and Meta-analysis

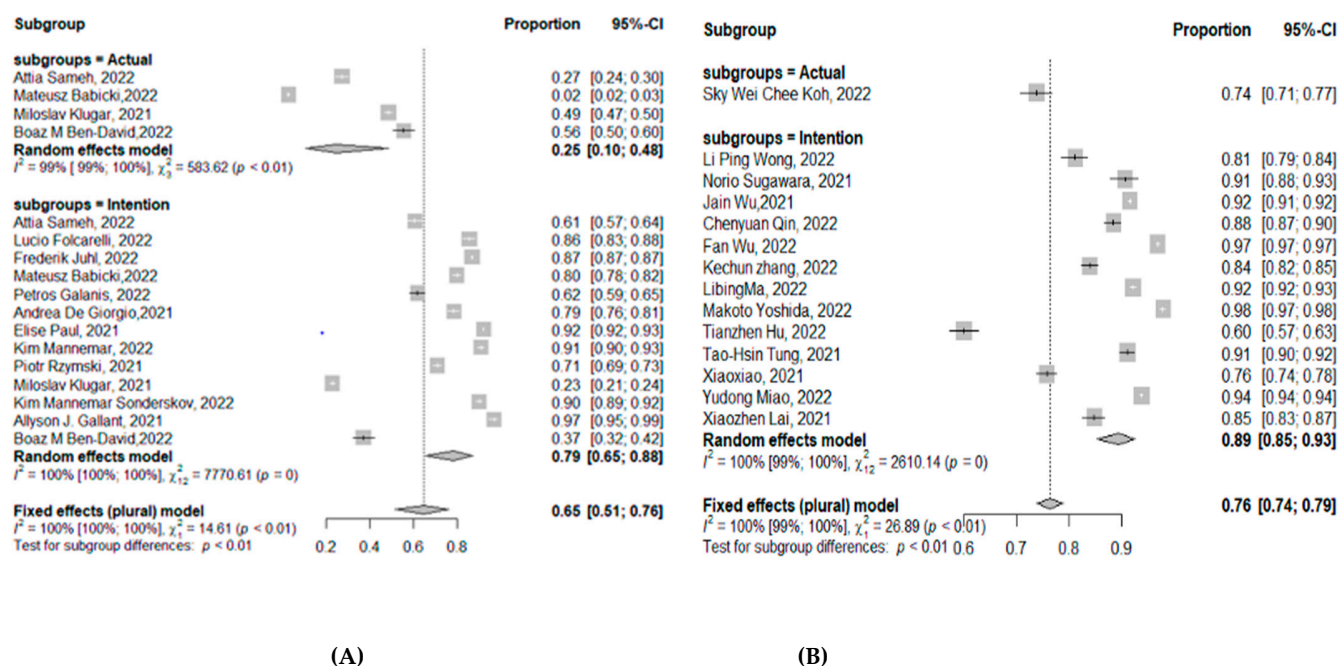

Subgroup actual and intentional vaccination in the European region (A); and the Western Pacific region (B).

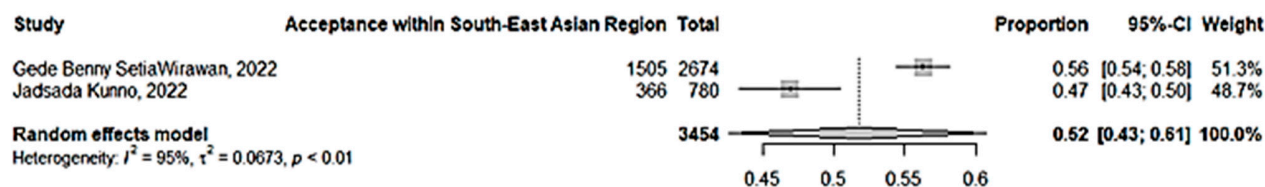

Booster dose COVID-19 vaccine acceptance in the South-East Asian region

Shaimaa Abdelaziz Abdelmoneim et al. COVID-19 Vaccine Booster Dose Acceptance: Systematic Review and Meta-analysis

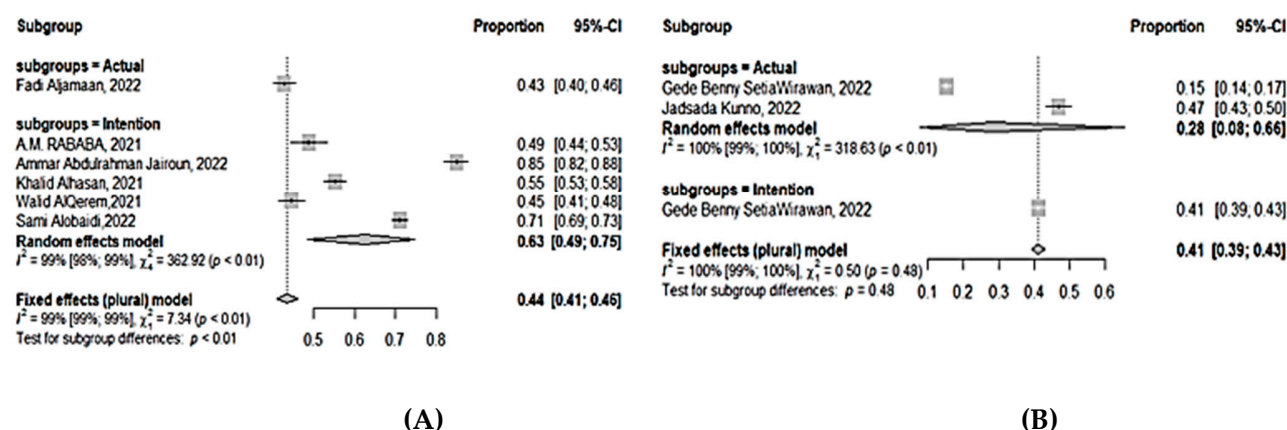

Subgroup analysis of COVID-19 booster dose vaccine acceptance in the Eastern Mediterranean (A) and South-East Asian (B) regions

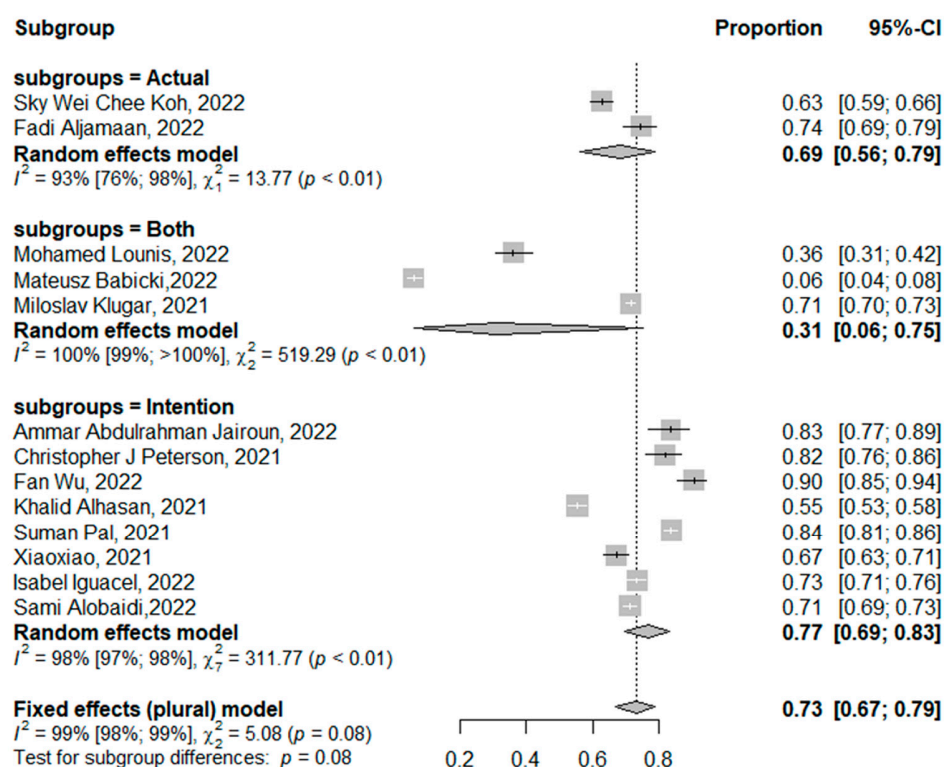

Subgroup analysis of healthcare workers (HCWs) actual and intention to accept the booster dose.
